# Supplementary material for: Untargeted metabolomics and transcriptomics identified glutathione metabolism disturbance and PCS and TMAO as potential biomarkers for ER stress in lung
Source: PubMed Central journal article supplement (PMC8290008; doi:10.1038/s41598-021-92779-8), 2021-07-19
Supplement: 41598_2021_92779_MOESM1_ESM.pdf [file 41598_2021_92779_MOESM1_ESM.pdf]

## Supplementary materials:

Figure S1: The cluster selected according to MCODE score of 48.317 (highest), nodes with top 10 MCC scores marked yellow.

Figure S2: The cluster selected according to MCODE score of 27.319 (second highest), nodes with top 10 MCC scores marked yellow.

Figure S3: The cluster selected according to MCODE score of 13.933 (third highest), nodes with top 10 MCC scores marked yellow.

Figure S4: Full length blots from which figure 1 (e) was made: the three pieces (S4 a-c) were from the same gel (adjustments were made to exposure intensity due to different levels of protein expression).

Table S1: Genes probed contributing to the phototransduction pathway.

Table S2: Aberrantly regulated genes enriched in glutathione metabolism.

Table S3. top 20 enriched pathways of MSEA results.

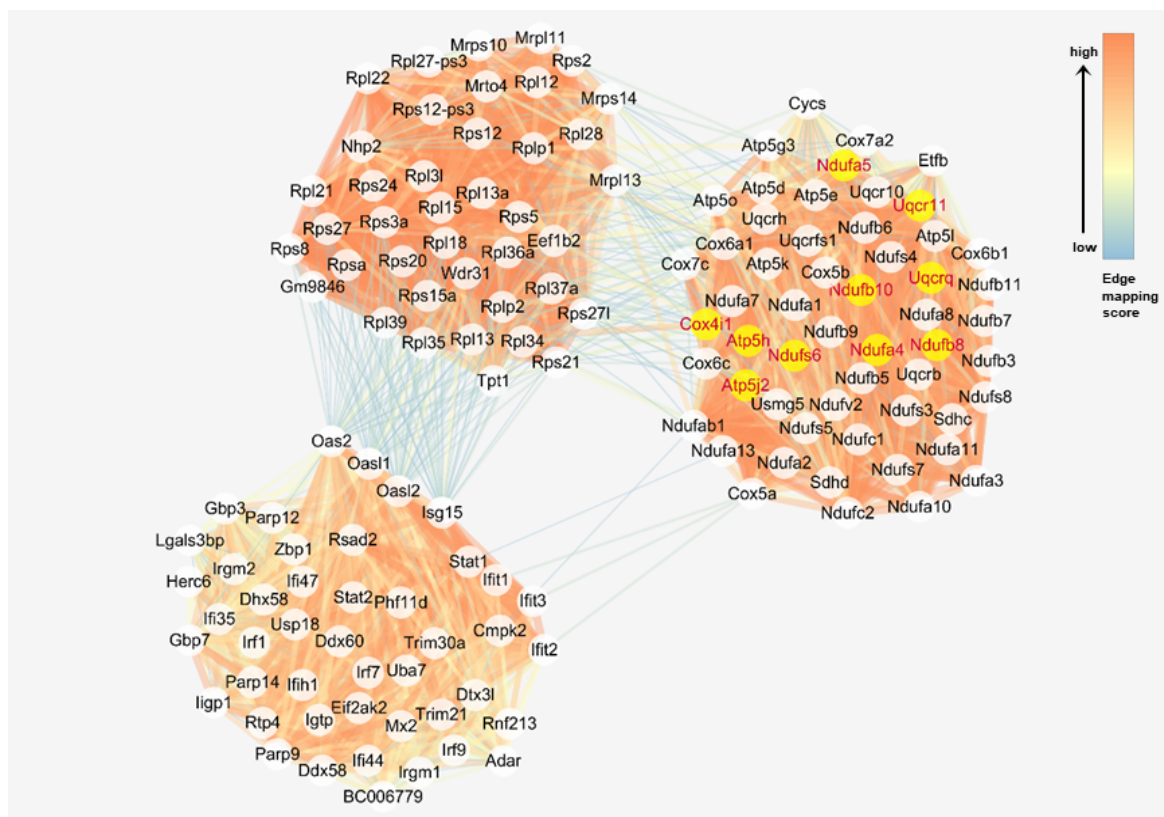

**Figure S1.** The first cluster selected according to MCODE score of 48.317 (highest), nodes with top 10 MCC scores marked yellow.

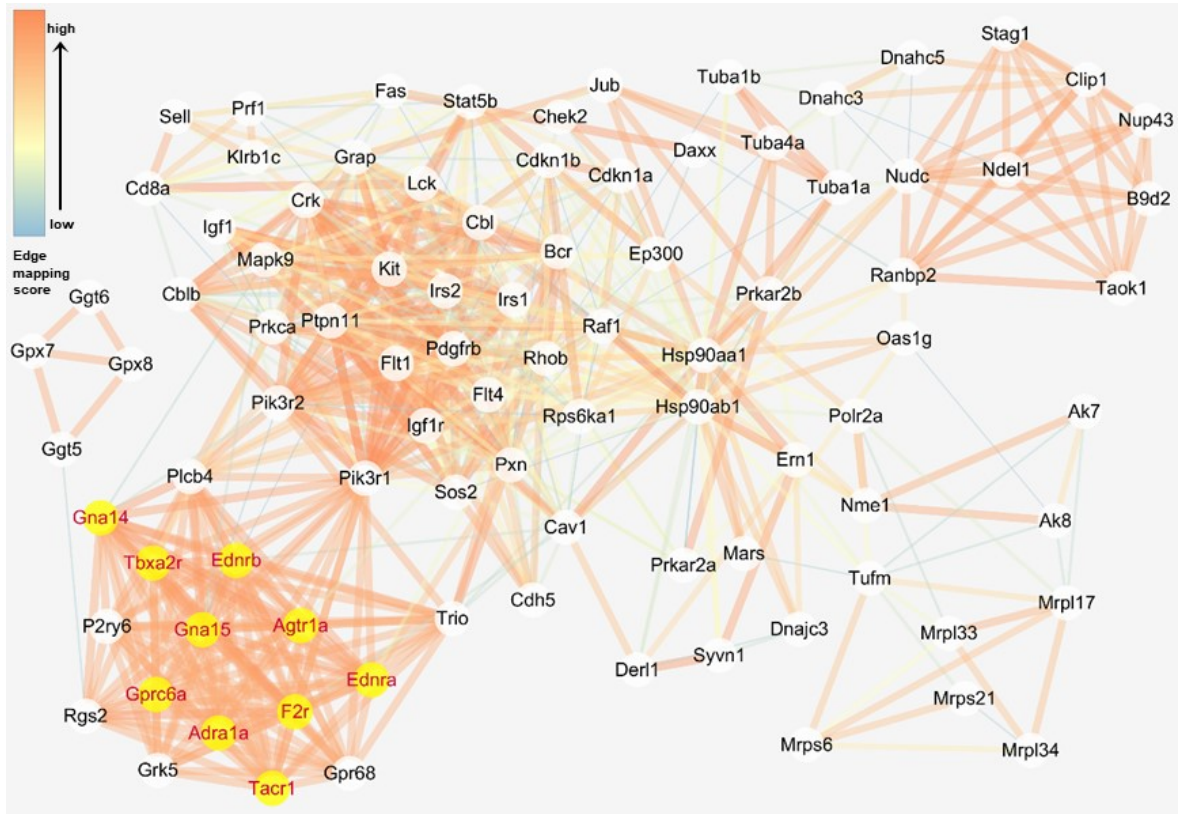

**Figure S2.** The second cluster selected according to MCODE score of 27.319 (second highest), nodes with top 10 MCC scores marked yellow.

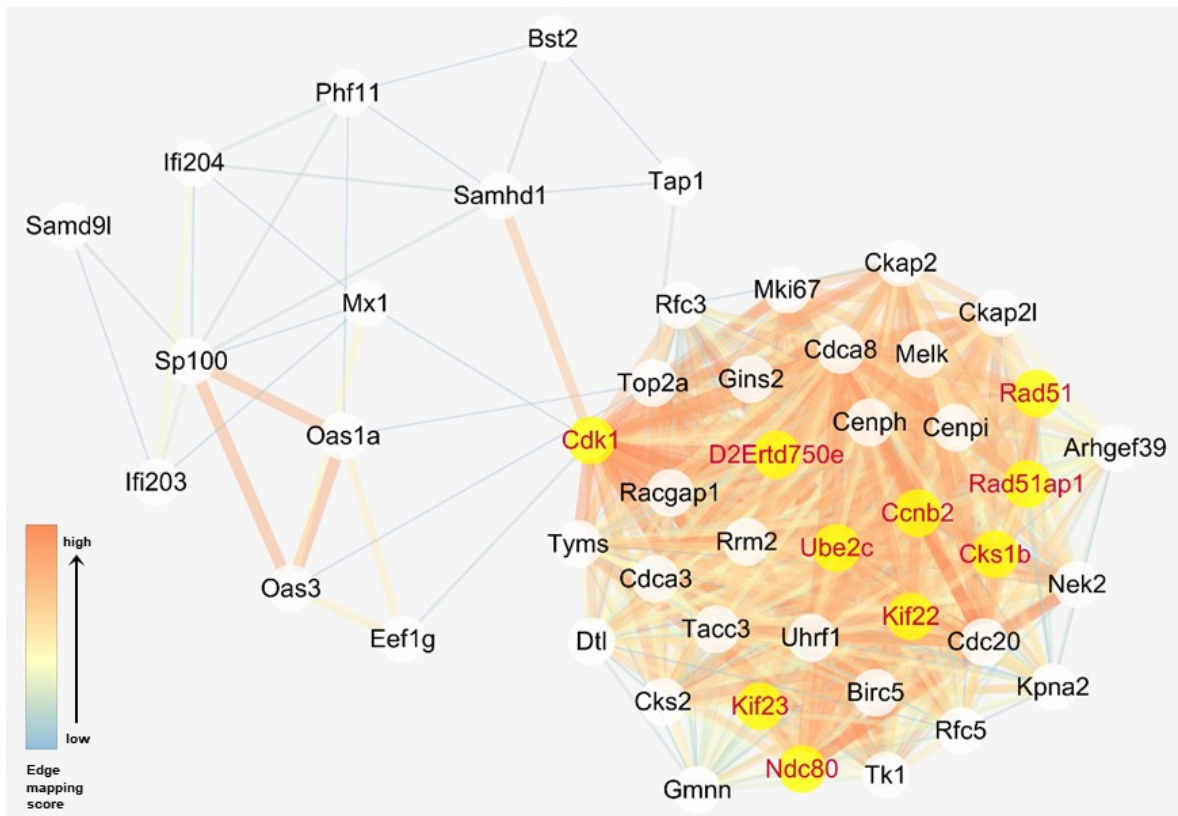

**Figure S3.** The third cluster selected according to MCODE score of 13.933 (third highest), nodes with top 10 MCC scores marked yellow.

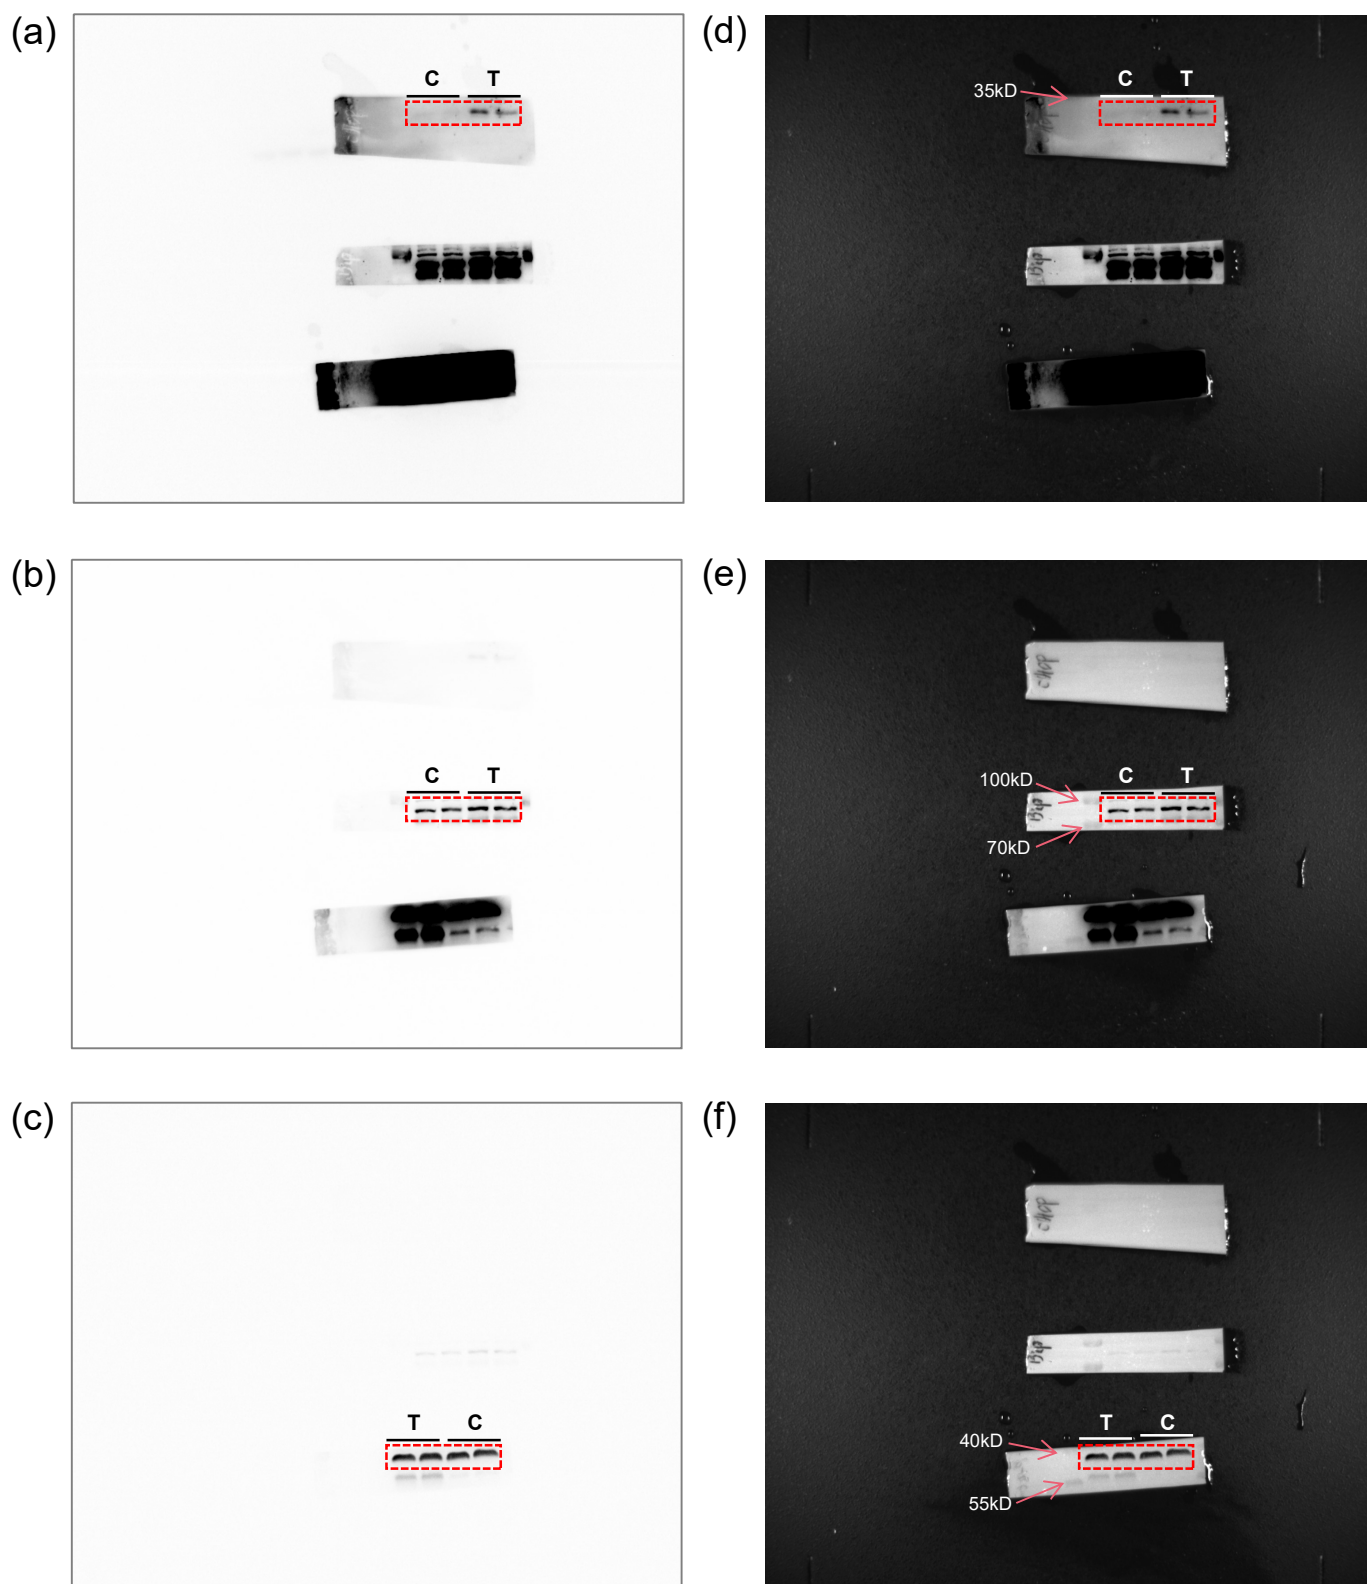

**Figure S4.** Full length blots from which figure 1 (e) was made (exposure intensity adjusted according to protein amount): CHOP (a, d-merge, expected position: 29kD), GRP78 (b, e-merge, 78kD) and  $\beta$ -actin (c, f-merge, 45kD).

**Table S1.** Genes probed contributing to the phototransduction pathway.

| Gene probe                  | Running ES | Core enrichment |
|-----------------------------|------------|-----------------|
| Cnga1(ENSMUSG00000067220)   | -0.6316    | Yes             |
| Grk1(ENSMUSG00000031450)    | -0.6150    | No              |
| Calm1(ENSMUSG00000001175)   | -0.6005    | Yes             |
| Sag (ENSMUSG00000056055)    | -0.5971    | No              |
| Gucy2e(ENSMUSG00000020890)  | -0.5910    | No              |
| Guca1b(ENSMUSG00000023979)  | -0.5805    | No              |
| Calm4(ENSMUSG00000033765)   | -0.5544    | Yes             |
| Calm3(ENSMUSG00000019370)   | -0.5070    | Yes             |
| Guca1a(ENSMUSG00000023982)  | -0.4713    | Yes             |
| Calm5(ENSMUSG00000099269)   | -0.4400    | No              |
| Calm4(ENSMUSG00000032246)   | -0.3932    | Yes             |
| Slc24a1(ENSMUSG00000034452) | -0.2407    | Yes             |
| Gucy2d(ENSMUSG00000074003)  | -0.2109    | No              |
| Gngt1(ENSMUSG00000029663)   | -0.1151    | No              |
| Pde6b(ENSMUSG00000029491)   | -0.0665    | No              |
| Gucy2f(ENSMUSG00000042282)  | -0.0663    | No              |
| Pde6a(ENSMUSG00000024575)   | -0.0654    | No              |
| Calm2(ENSMUSG00000036438)   | -0.0637    | No              |
| Rgs9(ENSMUSG00000020599)    | -0.0598    | No              |
| Rho (ENSMUSG00000030324)    | -0.0561    | No              |
| Rcvrn (ENSMUSG00000020907)  | -0.0510    | No              |
| Gnat1(ENSMUSG00000034837)   | -0.0478    | No              |
| Cngb1(ENSMUSG00000031789)   | -0.0473    | No              |
| Pde6g(ENSMUSG00000025386)   | -0.0292    | No              |
| Gnb1(ENSMUSG00000029064)    | -0.0261    | No              |
| Gnat2(ENSMUSG00000009108)   | -0.0225    | No              |
| Calm3(ENSMUSG00000063130)   | 0.0005     | Yes             |



**Table S2.** Aberrantly regulated genes enriched in glutathione metabolism.

| Gene name                  | Score in ranked gene list | Up / Down regulated |
|----------------------------|---------------------------|---------------------|
| Chac1(ENSMUSG00000027313)  | 2.25                      | Up                  |
| Gpx3(ENSMUSG00000018339)   | 1.51                      | Up                  |
| Gsta4(ENSMUSG00000032348)  | -1.94                     | Down                |
| Gsto1(ENSMUSG00000025068)  | -1.98                     | Down                |
| Mgst1(ENSMUSG00000008540)  | -1.37                     | Down                |
| Gstt1(ENSMUSG00000001663)  | -1.28                     | Down                |
| Gpx8(ENSMUSG00000021760)   | -1.31                     | Down                |
| Gstm6(ENSMUSG00000068762)  | -1.27                     | Down                |
| Gpx2(ENSMUSG00000042808)   | -1.14                     | Down                |
| Gpx1(ENSMUSG00000063856)   | -0.95                     | Down                |
| Gss (ENSMUSG00000027610)   | -1.22                     | Down                |
| Gpx4(ENSMUSG00000075706)   | -0.92                     | Down                |
| Gstm5(ENSMUSG00000004032)  | -1.29                     | Down                |
| Mgst2(ENSMUSG00000074604)  | -1.22                     | Down                |
| Idh1(ENSMUSG00000025950)   | -0.92                     | Down                |
| Odc1(ENSMUSG00000011179)   | -0.80                     | Down                |
| Gstp1(ENSMUSG00000060803)  | -0.87                     | Down                |
| Pgd (ENSMUSG00000028961)   | -0.85                     | Down                |
| Rrm2(ENSMUSG00000020649)   | -1.28                     | Down                |
| Ggt5(ENSMUSG00000006344)   | -1.05                     | Down                |
| Ggt6(ENSMUSG00000040471)   | -0.93                     | Down                |
| Anpep (ENSMUSG00000039062) | -0.88                     | Down                |
| Mgst3(ENSMUSG00000026688)  | -0.77                     | Down                |
| Sms (ENSMUSG00000071708)   | -0.86                     | Down                |
| Gstt3(ENSMUSG00000001665)  | -0.80                     | Down                |
| Gsta2(ENSMUSG00000057933)  | -0.78                     | Down                |
| Gstm2(ENSMUSG00000040562)  | -0.74                     | Down                |
| Gpx7(ENSMUSG00000028597)   | -0.83                     | Down                |
| Gsta1(ENSMUSG00000074183)  | -2.68                     | Down                |
| Gstm4(ENSMUSG00000027890)  | -0.96                     | Down                |

**Table S3.** top 20 enriched pathways of MSEA results.

| Metabolite Set                   | total | expected | hits | fold | P-value |
|----------------------------------|-------|----------|------|------|---------|
| Glutathione Metabolism           | 6     | 1.68     | 4    | 2.38 | 0.0494  |
| Arginine and Proline Metabolism  | 12    | 3.35     | 6    | 1.79 | 0.0737  |
| Glutamate Metabolism             | 10    | 2.8      | 5    | 1.79 | 0.105   |
| Alanine Metabolism               | 5     | 1.4      | 3    | 2.14 | 0.131   |
| Arachidonic Acid Metabolism      | 5     | 1.4      | 3    | 2.14 | 0.131   |
| Aspartate Metabolism             | 8     | 2.24     | 4    | 1.79 | 0.149   |
| Glycine and Serine Metabolism    | 14    | 3.91     | 6    | 1.53 | 0.153   |
| Urea Cycle                       | 11    | 3.08     | 5    | 1.62 | 0.154   |
| Malate-Aspartate Shuttle         | 3     | 0.839    | 2    | 2.38 | 0.188   |
| Phosphatidylcholine Biosynthesis | 3     | 0.839    | 2    | 2.38 | 0.188   |
| Carnitine Synthesis              | 6     | 1.68     | 3    | 1.79 | 0.213   |
| Tyrosine Metabolism              | 6     | 1.68     | 3    | 1.79 | 0.213   |
| Biotin Metabolism                | 1     | 0.28     | 1    | 3.57 | 0.28    |
| Folate Metabolism                | 1     | 0.28     | 1    | 3.57 | 0.28    |
| Inositol Metabolism              | 1     | 0.28     | 1    | 3.57 | 0.28    |
| Porphyryn Metabolism             | 1     | 0.28     | 1    | 3.57 | 0.28    |
| Starch and Sucrose Metabolism    | 1     | 0.28     | 1    | 3.57 | 0.28    |
| Vitamin B6 Metabolism            | 1     | 0.28     | 1    | 3.57 | 0.28    |
| Methionine Metabolism            | 10    | 2.8      | 4    | 1.43 | 0.289   |
| Warburg Effect                   | 10    | 2.8      | 4    | 1.43 | 0.289   |
